# Supplementary material
Source: publisher figshare collection journal article supplement (https://diabetesjournals.figshare.com/ndownloader/files/25944512)
Supplement: Supplementary file 1 [file 25944512]

**Table S1. Summary of QIC for comparing the two GEE models.** Quasi-likelihood information criterion (QIC) was used to compare the goodness of fit for the two GEE models. The calculation of QIC considers how well the model fits the data while favoring simpler models via a penalization term for the number of variables included. A smaller QIC indicates a better model fit. Interaction effects are denoted as two variables separated by an asterisk. QIC was calculated using the QIC function in the geepack version 1.2 R package.

| <b>Model</b> | <b>Model Variables</b>                                                                                                     | <b>QIC</b> |
|--------------|----------------------------------------------------------------------------------------------------------------------------|------------|
| Model 1      | Duration<br>Onset age<br>GRS<br>Duration*GRS                                                                               | 359.2      |
| Model 2      | Onset age<br>Duration<br>GRS<br>Duration*IA-2A<br>GRS*ZnT8A<br>GADA<br>Onset age*ZnT8A<br>Duration*ZnT8A<br>IA-2A<br>ZnT8A | 334.6      |
